# Supplementary material
Source: PubMed Central journal article supplement (PMC556249)
Supplement: pnas_102_15_5380__1.pdf [file pnas_102_15_5380__1.pdf]

**Table 1. Functional PSE-4/TEM-1 chimeras**

| Chimera | A | B | C | D | E | F | G | H | I | J | K | L | M | N | <i>m</i> |
|---------|---|---|---|---|---|---|---|---|---|---|---|---|---|---|----------|
| 1       | P | P | P | P | P | P | P | P | T | P | P | P | P | P | 7        |
| 2       | P | P | P | P | P | T | P | P | P | P | P | P | P | P | 7        |
| 3       | P | P | P | P | P | P | P | T | P | P | P | P | P | P | 7        |
| 4       | P | P | P | P | P | P | P | P | P | P | P | T | P | P | 11       |
| 5       | P | P | P | P | P | T | P | P | T | P | P | P | P | P | 14       |
| 6       | P | P | P | P | T | P | P | P | P | P | P | P | P | P | 14       |
| 7       | P | P | P | P | P | T | P | P | P | P | T | P | P | P | 16       |
| 8       | P | P | P | P | T | T | P | P | P | P | P | P | P | P | 21       |
| 9       | P | P | P | P | T | P | P | P | T | P | P | P | P | P | 21       |
| 10      | P | P | P | P | P | P | P | P | P | T | P | P | P | P | 22       |
| 11      | P | P | P | P | P | T | P | P | T | P | T | P | P | P | 23       |
| 12      | P | P | P | P | T | T | P | P | T | P | P | P | P | P | 28       |
| 13      | P | P | P | P | T | T | P | P | P | P | T | P | P | P | 30       |
| 14      | P | P | T | P | T | T | P | P | T | P | P | P | P | P | 35       |
| 15      | P | P | P | P | P | T | P | P | T | P | P | T | T | P | 36       |
| 16      | P | P | T | P | P | T | T | T | P | P | P | T | P | P | 40       |
| 17      | P | P | P | P | T | T | P | P | P | P | P | T | T | P | 43       |
| 18      | P | P | P | T | T | T | T | T | T | P | P | P | P | P | 53       |
| 19      | P | P | P | T | T | T | T | T | P | P | P | T | P | P | 58       |
| 20      | P | T | P | P | T | T | T | T | P | P | P | T | P | P | 60       |
| 21      | P | P | P | T | T | T | T | P | P | T | P | T | T | P | 67       |
| 22      | P | P | P | T | T | T | T | T | P | T | P | T | P | P | 71       |
| 23      | P | P | P | T | P | T | T | T | T | T | P | T | P | P | 73       |
| 24      | P | P | P | T | T | T | T | T | P | T | P | T | P | P | 78       |
| 25      | P | T | T | T | T | P | T | P | P | T | P | T | T | P | 94       |
| 26      | P | P | P | T | T | T | T | T | T | T | P | T | T | P | 96       |
| 27      | T | T | P | T | T | T | T | T | T | P | P | T | T | T | 111      |
| 28      | T | T | P | T | T | T | T | T | P | T | P | T | T | T | 126      |
| 29      | T | T | P | T | T | T | T | T | T | T | P | T | T | T | 133      |
| 30      | T | T | T | T | P | T | T | T | T | T | T | T | T | T | 135      |
| 31      | T | T | T | T | T | T | T | T | P | T | T | T | T | T | 142      |
