# Supplementary material
Source: PubMed Central journal article supplement (PMC556249)
Supplement: pnas_102_15_5380__3.pdf [file pnas_102_15_5380__3.pdf]

**Table 2. Characteristics of PSE-4 mutant libraries**

|                                                                                         | Library A      | Library B         | Library C          | Library D           |
|-----------------------------------------------------------------------------------------|----------------|-------------------|--------------------|---------------------|
| Nucleotides sequenced *                                                                 | 7,879          | 6,824             | 6,344              | 7,656               |
| Synonymous substitutions                                                                | 18             | 38                | 52                 | 84                  |
| Nonsynonymous substitutions                                                             | 41             | 57                | 114                | 191                 |
| Nucleotide deletions                                                                    | 3              | 4                 | 6                  | 5                   |
| Nonsynonymous substitutions producing stop codons                                       | 2              | 4                 | 4                  | 8                   |
| Library average nucleotide substitutions/gene ( $\langle m_{nt} \rangle$ ) <sup>†</sup> | 7.20<br>± 1.23 | 13.27<br>± 1.76   | 24.81<br>± 2.62    | 33.46<br>± 2.78     |
| Fraction of clones surviving selection ( $P_f(\langle m_{nt} \rangle)$ )                | 0.13<br>±0.015 | 0.0142<br>±0.0032 | 0.00158<br>±0.0004 | 0.00007<br>±0.00007 |
| Eq. 1 with $v = 0.54$ and auxiliary assumption                                          | 0.112          | 0.0170            | 0.00063            | 0.000049            |
| Eq. 1 with $v = 0.54$ , no auxiliary assumption                                         | 0.118          | 0.0196            | 0.00064            | 0.000049            |

\* Nine to 10 clones were partially sequenced from each library.

<sup>†</sup> Library average nucleotide mutations per gene  $\langle m_{nt} \rangle$  equals the sum of synonymous mutations, nonsynonymous mutations, and deletions divided by the number of gene equivalents sequenced (base pairs sequenced / 915). Errors are the expected standard errors calculated following the methods of ref. 1.

1. Drummond, D. A., Iverson, B. L., Georgiou, G., and Arnold, F. H. (2005) arXiv: q-bio.QM/0411041.
