# Supplementary material
Source: PubMed Central journal article supplement (PMC556249)
Supplement: pnas_102_15_5380__5.pdf [file pnas_102_15_5380__5.pdf]

**Table 3. Values of neutrality  $\nu$  and recombinational tolerance  $\rho$  for the lattice protein structures examined**

| Structure # * | $\langle \nu \rangle \pm \sigma_\nu$ | $\langle \rho \rangle \pm \sigma_\rho$ |
|---------------|--------------------------------------|----------------------------------------|
| 415 †         | $0.104 \pm 0.013$                    | $0.699 \pm 0.053$                      |
| 414 ‡         | $0.128 \pm 0.002$                    | $0.749 \pm 0.056$                      |
| 820           | $0.196 \pm 0.019$                    | $0.754 \pm 0.057$                      |
| 873           | $0.275 \pm 0.020$                    | $0.830 \pm 0.038$                      |
| 19            | $0.280 \pm 0.030$                    | $0.805 \pm 0.048$                      |
| 350           | $0.314 \pm 0.016$                    | $0.858 \pm 0.032$                      |
| 55            | $0.380 \pm 0.025$                    | $0.850 \pm 0.027$                      |
| 200           | $0.385 \pm 0.016$                    | $0.849 \pm 0.015$                      |
| 300           | $0.426 \pm 0.004$                    | $0.882 \pm 0.028$                      |
| 1080          | $0.480 \pm 0.012$                    | $0.891 \pm 0.022$                      |

\* See Table 4 for pictures of each structure.

† Only two values of  $D$  (5 and 10) were evaluated.

‡ Only three values of  $D$  (5, 10, and 15) were evaluated.
