# Supplementary material
Source: PubMed Central journal article supplement (PMC556249)
Supplement: pnas_102_15_5380__6.pdf [file pnas_102_15_5380__6.pdf]

**Table 4. Lattice protein structures**

| ID | Structure                                                                                                                           | ID  | Structure                                                                                                                                   |                                                                                                                                              |                                                                                                                                               |                                                                                                                                                |                                                                                                                                                  |                                                                                                                                                |                                                                                                                                                 |                                                                                                                                                  |                                                                                                                                                |
|----|-------------------------------------------------------------------------------------------------------------------------------------|-----|---------------------------------------------------------------------------------------------------------------------------------------------|----------------------------------------------------------------------------------------------------------------------------------------------|-----------------------------------------------------------------------------------------------------------------------------------------------|------------------------------------------------------------------------------------------------------------------------------------------------|--------------------------------------------------------------------------------------------------------------------------------------------------|------------------------------------------------------------------------------------------------------------------------------------------------|-------------------------------------------------------------------------------------------------------------------------------------------------|--------------------------------------------------------------------------------------------------------------------------------------------------|------------------------------------------------------------------------------------------------------------------------------------------------|
| 19 | 01--02--03--04--05<br> <br>20--21--22--23 06<br>   <br>19 14--13 24 07<br>       <br>18 15 12 25 08<br>       <br>17--16 11--10--09 | 414 | 15--16 01--02--03<br>       <br>14 17 22--23 04<br>       <br>13 18 21 24 05<br>       <br>12 19--20 25 06<br>       <br>11--10--09--08--07 |                                                                                                                                              |                                                                                                                                               |                                                                                                                                                |                                                                                                                                                  |                                                                                                                                                |                                                                                                                                                 |                                                                                                                                                  |                                                                                                                                                |
|    | 55                                                                                                                                  |     | 415                                                                                                                                         | 01--02--03--04--05<br> <br>14--13--12--11 06<br>       <br>15--16--17 10 07<br>       <br>20--19--18 09--08<br>       <br>21--22--23--24--25 | 15--16 01--02--03<br>       <br>14 17 20--21 04<br>       <br>13 18--19 22 05<br>       <br>12 25--24--23 06<br>       <br>11--10--09--08--07 |                                                                                                                                                |                                                                                                                                                  |                                                                                                                                                |                                                                                                                                                 |                                                                                                                                                  |                                                                                                                                                |
|    |                                                                                                                                     |     |                                                                                                                                             | 200                                                                                                                                          | 820                                                                                                                                           | 01--02--03 16--17<br>       <br>08--07 04 15 18<br>       <br>09 06--05 14 19<br>       <br>10--11--12--13 20<br>       <br>25--24--23--22--21 | 07--06--05--04--03<br>       <br>08 21--20 01--02<br>       <br>09 22 19--18--17<br>       <br>10 23--24--25 16<br>       <br>11--12--13--14--15 |                                                                                                                                                |                                                                                                                                                 |                                                                                                                                                  |                                                                                                                                                |
|    |                                                                                                                                     |     |                                                                                                                                             |                                                                                                                                              |                                                                                                                                               | 300                                                                                                                                            | 873                                                                                                                                              | 01--02 21--22 25<br>       <br>04--03 20 23--24<br>       <br>05 18--19 14--13<br>       <br>06 17--16--15 12<br>       <br>07--08--09--10--11 | 25 06--05--04--03<br>       <br>24 07--08 01--02<br>       <br>23--22 09 12--13<br>       <br>20--21 10--11 14<br>       <br>19--18--17--16--15 |                                                                                                                                                  |                                                                                                                                                |
|    |                                                                                                                                     |     |                                                                                                                                             |                                                                                                                                              |                                                                                                                                               |                                                                                                                                                |                                                                                                                                                  | 350                                                                                                                                            | 1080                                                                                                                                            | 01--02 11--12--13<br>       <br>04--03 10--09 14<br>       <br>05--06--07--08 15<br>       <br>22--21--20--19 16<br>       <br>23--24--25 18--17 | 19--20 23--24--25<br>       <br>18 21--22 03--04<br>       <br>17--16 01--02 05<br>       <br>14--15 10--09 06<br>       <br>13--12--11 08--07 |
