# Supplementary material
Source: PubMed Central journal article supplement (PMC556249)

## Comparison of Library Disruption

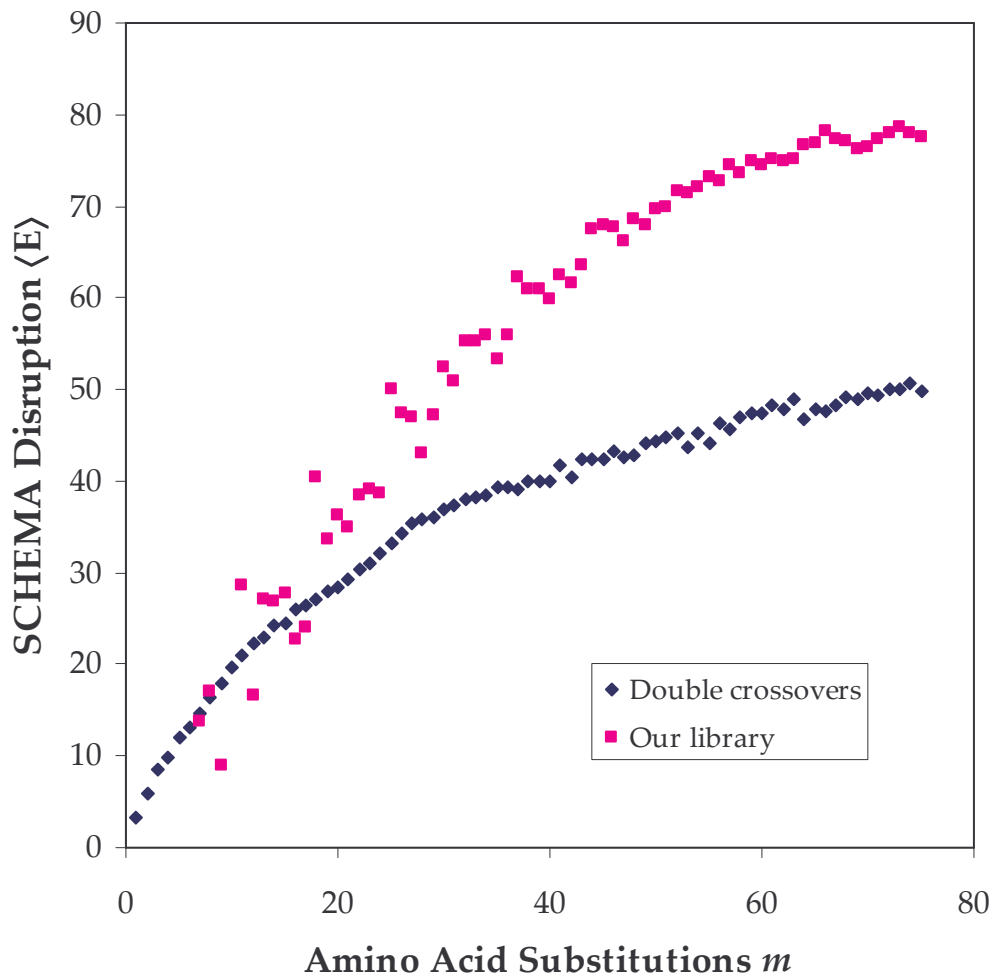

Supplement: pnas_102_15_5380__4.pdf [file pnas_102_15_5380__4.pdf]
